## Spatio-temporal Dynamics of the Patterning of *Arabidopsis* Flower Meristem

1 **José Díaz<sup>1</sup>, Elena R. Álvarez-Buylla<sup>2,3\*</sup>**

2 <sup>1</sup>Laboratorio de Dinámica de Redes Genéticas, Centro de Investigación en Dinámica Celular,  
3 Universidad Autónoma del Estado de Morelos, Cuernavaca, Morelos, México.

4 <sup>2</sup> Laboratorio de Genética Molecular, Desarrollo y Evolución de Plantas, Departamento de Ecología  
5 Funcional, Instituto de Ecología, Universidad Nacional Autónoma de México, Ciudad de México,  
6 México.

7 <sup>3</sup> Centro de Ciencias de la Complejidad (C3), Universidad Nacional Autónoma de México, Ciudad de  
8 México, México.

9

10

11

12

13

14

15

16

17

18 **\* Correspondence:**

19 José Díaz

20 [biofisica@yahoo.com](mailto:biofisica@yahoo.com)

21 Elena R. Álvarez-Buylla

22 [elenabuylla@protonmail.com](mailto:elenabuylla@protonmail.com)

23

24

25

26 **Keywords:** WUSCHEL pre-pattern, flower development, floral organ specification, reaction-  
27 diffusion models.

28

## 29 Abstract

30 The qualitative model presented in this work recovers the onset of the four fields that correspond to  
31 those of each floral organ whorl of *Arabidopsis* flower, suggesting a mechanism for the generation of  
32 the positional information required for the differential expression of the A, B and C identity genes  
33 according to the ABC model for organ determination during early stages of flower development. Our  
34 model integrates a previous model for the emergence of WUS pattern in the apical meristem, and  
35 shows that this pre-pattern is a necessary but not sufficient condition for the posterior information of  
36 the four fields predicted by the ABC model. Furthermore, our model predicts that LFY diffusion  
37 along the L1 layer of cells is not a necessary condition for the patterning of the floral meristem.

## 38 1 Introduction

39 Morphogenesis occurs in plants during their whole life-cycle, with aerial and root structures forming  
40 from groups of undifferentiated or stem cells within niches found in the apical meristems in the shoot  
41 and root tips, respectively. When a plant becomes florally induced the shoot apical meristem (SAM)  
42 switches from a vegetative to an inflorescence meristem. The vegetative meristem only produces  
43 leaves as lateral organs, while the inflorescence one produces flowers that arise from its flanks in a  
44 spiral arrangement. Flowers develop from the floral meristems and in *Arabidopsis* the four sepal  
45 primordia are the first to arise from the outermost of the flower meristem (18 hrs after floral  
46 primordial formation), and the remaining floral meristem interior differentiates into the other whorls  
47 with the gynoecial primordium forming in the center of the floral primordium. At least four genes are  
48 necessary for the specification of floral meristem identity in *Arabidopsis*: *LEAFY* (*LFY*),  
49 *CAULIFLOWER* (*CAL*), *APETALA1* (*API*) and *FRUITFULL* (*FUL*) (Maizel and Weigel, 2004;  
50 Moyroud et al., 2001; Mandel et al., 1992).

51 After flower meristem specification, floral organ cell-fate determination occurs. The so-called ABC  
52 genes are necessary for this process (Figure 1a). Indeed, according to the ABC model of flower  
53 development the A genes (*APETALA1* (*API*) and *APETALA2* (*AP2*)) are expressed alone in the  
54 outer whorl of the floral meristem and are necessary for sepal specification. A and B genes  
55 (*PISTILLATA* (*PI*) and *APETALA3* (*AP3*)) are necessary for petal specification in the second whorl  
56 of the floral meristem, while B and C genes (*AGAMOUS* (*AG*)) together are necessary for stamen  
57 specification in the third whorl, and finally C alone is necessary for carpel specification (Coen and  
58 Meyerowitz, 1999) in the innermost whorl of the floral meristem (Stewart et al., 2016) (see Figure  
59 1a). All of these genes, except *AP2*, are Type II MADS-box genes (Álvarez-Buylla et al., 2000) that  
60 codify for transcription factors with a DNA-binding domain (MADS), an intermediary domain (I), a  
61 putative protein-protein interaction domain (K) and a COOH putative transactivation domain (Coen  
62 and Meyerowitz, 1999; Ng and Yanofsky, 2001).

63 The floral identity MADS-box genes *API* and *AG* have a central role in the ABC model. *API* is a  
64 direct target of the flowering time gene *FLOWERING LOCUS T* (*FT*) that responds to light inductive  
65 conditions and of *LFY* (Álvarez-Buylla et al., 2010). Upon formation of the flower primordia *API* is  
66 activated by *LFY* and by *FT* under long-day light inductive conditions and is expressed throughout  
67 the whole floral meristem (Pidkowich et al., 1999). Previous experiments have suggested that neither  
68 *API* mRNA nor *API* protein move across the flower meristem (Sessions and Yanofski, 2000). *AG*,  
69 the C MADS-box gene, is activated by *WUS* (Espinosa-Soto et al., 2004; Jönsson et al., 2005; Jack,  
70 2004; Ikeda et al., 2009). It has also been suggested that *WUS* is necessary to release the inhibitory  
71 effect of *API* over *AG*. Once *AG* is expressed, its protein represses *API* in the two central whorls,

72 thus allowing for the spatial patterning of the floral meristem and the expression of the class B  
73 MADS-box genes (Jack, 2004).

74 Once the four whorls have been patterned, the AP1 protein forms complexes with a still unknown  
75 MADS-domain protein at the time of sepal identity specification in the first whorl, and AP1 interacts  
76 with APETALA3 (AP3), SEPALLATA (SEP) and PISTILLATA (PI) and this complex is necessary  
77 for petal specification in the second whorl. AG, in turn, interacts with SEP, PI and AP3 to form a  
78 protein quartet transcription complex required for stamen specification in the third whorl and finally  
79 AG associates with SEP genes to form the quartet transcriptional complex that is necessary for carpel  
80 specification in the fourth whorl (Pidkowich et al., 1999; Jack, 2004; Goto and Meyerowitz, 1994;  
81 Pelaz et al., 2000; Pelaz et al., 2001). Of relevance is the fact that *TERMINAL FLOWER1* (*TFL1*)  
82 counterbalances the action of floral meristem identity genes, *LFY*, *API* and *AG* (Parcy et al., 2002).  
83 *TFL1* encodes a protein that is highly similar to the animal RAF kinase inhibitors (Scheres, 1998).  
84 *TFL1* specifies inflorescence meristem identity and induces the indeterminate nature of the  
85 inflorescence.

86 As data accumulate on the complex regulatory networks that underlie plant and animal development,  
87 it is becoming possible and necessary to postulate formal dynamic models. These may be now  
88 grounded on such data, and at the same time are useful to integrate necessary and sufficient  
89 regulatory modules for pattern formation and help uncover experimental holes. Such models hence  
90 constitute formal frameworks to test novel hypotheses *in silico* that can then be tested *in vivo*, and  
91 they are also the basis for understanding how spatio-temporal patterns of gene expression are  
92 established during development. Several regulatory network models for cell fate determination have  
93 been proposed (Espinosa-Soto et al., 2004; Álvarez-Buylla et al., 2008). These models describe the  
94 dynamics of the genetic network that sustain cell differentiation during flower development and they  
95 are mostly single-cell models.

96 The model proposed in Espinosa-Soto et al. (2004) uncovered what seems to be the core of a  
97 regulatory module that robustly converges to documented combinatorial gene activities characteristic  
98 of each floral organ primordia. In Espinosa-Soto et al. (2004), it is shown that a 15-gene regulatory  
99 dynamic network model that incorporates the ABC genes, as well as eleven non-ABC genes (Barrio  
100 et al., 2010) constitutes a regulatory module that robustly converges to 10 steady gene expression  
101 configurations that correspond to combinations of gene expression that have been experimentally  
102 documented for inflorescence and floral organ primordial cells. Four of these steady states  
103 correspond to a configuration of gene activation that characterize inflorescence meristem cells, while  
104 the other six attractors correspond to primordial cells of sepals (1), petals (2), stamens (2) and  
105 carpels. Four of the fifteen genes included in the floral organ specification network seem to be  
106 directly responsible for the spatio-temporal patterning of the floral meristem. These genes are *LEAFY*  
107 (*LFY*), *APETALA1* (*API*), *AGAMOUS* (*AG*) and *TERMINAL FLOWER1* (*TFL1*) (Álvarez-Buylla et  
108 al, 2010; Pidkowich et al., 1999; Jack, 2004; Parcy et al., 2002), but their mechanism of action during  
109 flower patterning is not clear.

110 Although GRN single-cell models has been successful to uncover the set of interactions that are both  
111 necessary and sufficient to recover the combinations of gene expression levels that characterize  
112 different primordial cells during early flower development in *Arabidopsis*, these models do not  
113 address how the spatio-temporal pattern of cell-fate determination is attained during flower  
114 development or what could be the role of transcription factors whose role is non-autonomous at the  
115 cellular level (Haspolat et al., 2019; Wang et al., 2014). In this direction, relatively few attempts have

116 been done to understand the mechanisms underlying the emergence of spatio-temporal patterns  
117 (Jönsson et al., 2005; Dupoy et al., 2008; Alexeev et al., 2005; Barrio et al., 2010).

118 Some of such recent studies are suggesting that the emergence of spatio-temporal morphogenetic  
119 patterns partially depend on the uncovered intracellular regulatory networks (Álvarez-Buylla et al.,  
120 2008), but should also consider additional mechanisms that underlie the emergence of positional  
121 information. For example, in Barrio et al. (2010), a reduced version of the floral organ determination  
122 network was coupled with a physical field to explore the emergence of floral organ spatio-temporal  
123 patterns in wild type and mutant plants. In this work, the coupling of both fields leads to an interplay  
124 in which the macroscopic physical field breaks the symmetry of the floral meristem at any time, and  
125 gives rise to the differentiation of the meristem cells via a signal transduction mechanism that acts  
126 directly on the Gene Regulatory Network (GRN) that regulates cell-fate decisions during flowering.

127 In this direction, the works of Jönsson et al. (2005) and Gruel et al. (2016), propose a dynamic  
128 continuous system based on experimental results to study the underlying mechanism of *WUSCHEL*  
129 (*WUS*) spatial patterning during early stages of floral meristem determination and flower  
130 development (Alexeev et al., 2005). *WUS* is required for flowering and shoot and flower  
131 maintenance, it is stopped by *WUS* recessive mutations. In Alexeev et al. (2005), the authors  
132 proposed a reaction-diffusion model in which *WUS* is expressed in every point of the floral meristem  
133 unless a spatially distributed repressor signal is present. This repressor signal is induced by a signal  
134 from the extremes of the L1 sheet, and restricts *WUS* expression to the center of the sheet. The model  
135 accurately reproduces experimental observations in a two dimensional lattice of cells, and relates the  
136 repressor signals to *CLAVATA3* (*CVL3*) signaling. However, recovered patterns are not robust to  
137 variations in the parameters. Similar results were obtained by Gruel et al. (2016) who showed that the  
138 combination of signals originating from the epidermal cell layer, which include the *CVL3*-*WUS*  
139 negative feedback loop, can correctly pattern gene expression domains.

140 Thereby, the present contribution further elaborates on previous spatio-temporal models and explores  
141 the emergence of the four whorls of differential gene expression in the L1 layer of floral meristem  
142 cells in concordance with the ABC model of flower patterning. Our model shows how the four-whorl  
143 symmetry of the floral meristem dynamically arises from a spatially homogenous distribution of  
144 expression of *LFY*, *TFL1*, *API*, *AG* and *WUS* (Espinosa-Soto et al., 2004). The model takes into  
145 account the nonlinear interactions between *API*, *AG*, *LFY* and *TFL1* proteins during early flower  
146 development, and it also includes the equations for the spatial patterning of *WUS* expression  
147 presented in the work of Alexeev et al., (2005). We postulate that *WUSCHEL* spatial pre-pattern of  
148 expression *is a necessary but not sufficient* condition for the patterning of the floral meristem into the  
149 four whorls. *WUS* pre-pattern breaks the initial symmetry of the system and induces the expression of  
150 *AG* in the third and fourth whorls, and gives rise to a new symmetry that corresponds to the ABC  
151 model of gene expression Gruel et al. (2016).

152 The model also tests the role of *LFY* during the patterning of the floral meristem. *LFY* is a meristem-  
153 identity gene that responds to several internal and external flowering-inducing signals and also has a  
154 central role in regulating the patterns of the ABC genes (Álvarez-Buylla et al., 2008). At the same  
155 time, this gene is regulated for example by the flowering time gene *SUPPRESSOR OF*  
156 *OVEREXPRESSION OF CONSTANS* (*SOC1*) gene that integrates the flowering response to light,  
157 vernalization and gibberellins (GA), and is also a direct target of GA (Álvarez-Buylla et al., 2010;  
158 Pidkowich et al., 1999; Scheres, 1998; Villarreal et al., 2012; Boss et al., 2004; Okamoto et al., 1996;  
159 Traas and Vernoux, 2002). Previous experimental work has provided evidence for the movement of  
160 *LFY* protein, from the L1 layer into the internal layers L2 and L3 of the apical meristem, during  
161 flower development (Ingram, 2004). Thus, *LFY* forms a gradient of activation that extends from the

162 L1 to the L3 sheet of the SAM (Wu et al., 2003). Experiments carried out with the reporter Green  
163 Fluorescent Protein (GFP) expressed under the action of the *LFY* promoter have shown that the  
164 protein LFY moves along the L1 sheet of the SAM, where it forms a uniform field of activation (Wu  
165 et al., 2003). These results suggest that *diffusion of this protein is probably not critical for the spatial*  
166 *patterning of the L1 sheet during floral organ primordia specification* but no dynamic mechanism  
167 had been proposed for this. In the context of the model presented here, we show that the movement  
168 of LFY *along* the L1 sheet of the floral meristem is not a necessary condition for the onset of the  
169 ABC pattern of gene expression.

170 In conclusion, the aim of the model presented in this work is to demonstrate that the interaction of the  
171 four chemical fields generated by the interaction of LFY, TFL1, AG, AP1 and WUS can pattern the  
172 L1 cell layer into the three domains of gene expression according to the ABC model of flowering.  
173 The model suggests five main points: a) LFY diffusion does not take a fundamental part in the  
174 patterning of the floral meristem *along* the L1 sheet of cells; b) the pattern obtained from the model  
175 defines three domains of gene expression according to the ABC model of flowering; c) WUS pre-  
176 pattern *is a necessary but not a sufficient condition* for the correct patterning of the L1 layer of the  
177 floral meristem; d) the spatio-temporal distribution of *LFY*, *AP1*, *AG*, and *TFL1* products along the  
178 L1 sheet can effectively be a necessary but not sufficient condition for floral organ determination,  
179 once the WUS pre-pattern has been established; e) exists, at least, a set of parameters values for  
180 which we can obtain a solution of the model that resembles the experimentally observed ABC  
181 pattern.

## 182 **2 Model**

183 In the model, we propose hypothetical 15 cells along the L1 layer of the floral meristem with a near  
184 uniform average size of about 4.4  $\mu\text{m}$  each one. In consequence, the diameter of the layer is  $\sim 66 \mu\text{m}$ .  
185 We assume that each one of these  $\sim 15$  cells along the diameter of the meristem is characterized only  
186 by the amount of the protein produced by *LFY*, *AP1*, *AG*, *WUS*, and *TFL1* at time  $t$ , which is a  
187 measure of the activation level of the respective gene. In the model, we covered the L1 layer with 15  
188 of these idealized cells.

189 In order to test only the role of the interaction of these proteins in the patterning of the L1 sheet, we  
190 assume that during the time of simulation the size of the L1 layer is constant and that the LFY  
191 difference of concentration along the L1-L3 direction is small enough to no significantly affect LFY  
192 concentration in the L1 sheet during the time of simulation.

193 In the research papers of Espinoza-Soto et al. (2004), Álvarez-Buylla et al. (2008), Barrio et al.  
194 (2010), and Villarreal et al. (2012), the experimental gene data that support the regulatory  
195 interactions of *LFY*, *AP1*, *AG*, and *TFL1* during floral induction are summarized and formalized in  
196 the form of tables of logical rules. The mathematical model presented below is a direct translation of  
197 these logical rules into its corresponding continuous mathematical expressions (Figure 1b). Thus, the  
198 logical rules are used as a guidance to establish the equations that are postulated here to drive the  
199 ABC patterning process. In these mathematical equations we represent the amount of each protein  
200 with their respective name in lower case italic letters.

201 In this form, from Figure 1b we propose that the rate of *LFY* activation results from a balance  
202 between the intrinsic rate of activation of the gene ( $k_i$ ), the rate at which it is activated by protein  
203 AP1, the rate at which it is inactivated by protein TFL1 and the intrinsic rate of inactivation of the

204 gene itself. Finally, we must take into account the interaction among L1 cells due to LFY movement.  
 205 According to the method of discretization of the meristem we obtain the equation:

$$206 \quad \frac{dlfy(j,t)}{dt} = k_1 + k_2 ap1(j,t) - k_3 tfl1(j,t) - k_4 lfy(j,t) + \varepsilon [lfy(j+1,t) - 2lfy(j,t) + lfy(j-1,t)] \quad (1)$$

207 where  $j = 1, 2, 3, \dots, 15$  is the number of the cell,  $\varepsilon = \frac{D_{lfy}}{\Delta x^2}$  is the coupling coefficient between cells,  
 208  $D_{lfy}$  is the diffusion coefficient of LFY and  $\Delta x$  is the length of a idealized cell. Protein LFY cannot  
 209 flow out of the meristem though the extremes of the array of cells, and is initially distributed at a  
 210 uniform basal concentration along it.

211 From Figure 1b, the rate of *API* activation results from a balance between its intrinsic rate of  
 212 activation ( $k_5$ ), the rate at which it is activated by LFY protein, the rate at which it is inactivated by  
 213 TFL1 protein, and the rate of inactivation of the gene itself. Once the *AG* gene is activated as a result  
 214 of the presence of WUS protein in the centre of the flower meristem, *AG* protein turns off *API*  
 215 activity from the zone corresponding to the third and fourth whorls and *API* protein turns off *AG*  
 216 activity from the first and second whorls. As we mentioned before, neither *API* nor *AG* seem to  
 217 diffuse among cells. Thus, the spatial patterning of the L1 cell layer of the presumptive floral  
 218 meristem lies on the exclusion action between these two proteins by a yet unknown kinetic  
 219 mechanism. Consequently we propose the following equations that describe the activation of *API* in  
 220 cell  $j$  at time  $t$ :

$$221 \quad \frac{dap1(x,t)}{dt} = k_5 + k_6 lfy(j,t) - k_7 tfl1(j,t) - k_8 ap1(j,t)$$

$$ap1_T(j,t) = ap1(j,t) \left[ 1 - \frac{ag(j,t)}{ag(j,t) + \beta_1} \right] \quad (2)$$

222 where  $ap1_T(j,t)$  is the distribution of *API* protein along the meristem due to the presence of *AG*  
 223 protein.

224 As reviewed in Espinoza-Soto et al. (2004) and Goto and Meyerowitz (1994), the rate at which *AG* is  
 225 activated depends on its rate of activation by LFY protein, the rate at which it is inactivated by TFL1  
 226 protein and its rate of inactivation. The rate at which *AG* activation level increases in the system  
 227 tightly depends on the WUS protein pre-pattern (Figure 1b). According to Álvarez-Buylla et al.,  
 228 (2010) and Espinosa-Soto et al. (2004) there is a double negative loop between *API* and *AG*, in  
 229 which *AG* inhibits *API* expression from whorls 3 and 4, and *API* inhibits *AG* expression from whorl  
 230 1 and 2. In this form, we propose a noncompetitive inhibition of *API* protein on the production of  
 231 *AG*:

$$232 \quad \frac{dag(j,t)}{dt} = u(t-5) \left[ \frac{k_9 wus(j,t) + k_{10} lfy(j,t)}{\beta_2 + \beta_3 ap1(j,t)} - k_{11} tfl1(j,t) - k_{12} ag(j,t) \right] \quad (3)$$

233 where  $u(t-5)$  represents the unitary step function that lags *AG* spatial pattern formation until  $t = 5$   
 234 h. We are not explicitly modeling the mechanism that regulates flowering time and the function  $u$  is  
 235 necessary for the correct timing of the process in the model. However, if  $u$  is not used the *AG* spatial

236 pattern emerges after a few integration steps. In every case, *AG* spatial expression pattern arises once  
 237 the *WUS* expression pre-pattern is established.

238 As reviewed in Álvarez-Buylla et al., (2010) and Espinosa-Soto et al. (2004), the rate at which *TFL1*  
 239 activation level increases in the system results from a balance between its intrinsic rate of activation  
 240 ( $k_{13}$ ), the rate at which it is inactivated by LFY protein, the rate at which it is inactivated by AP1  
 241 protein and its rate of inactivation:

$$242 \quad \frac{dtfl1}{dt} = k_{13} - k_{14}lfy(j,t) - k_{15}ap1(j,t) - k_{16}tfl1(j,t) \quad (4)$$

243 Jönsson et al. (2005) shown that the pattern of *WUS* expression has its maximum approximately at  
 244 the center of the L1 fourth whorl, and does not expand too far from this center (Figure 2a). In this  
 245 work, we adapted the repressor model of Jönsson et al. (2005), which consists of the following  
 246 equations:

$$\begin{aligned} \frac{dwus(j,t)}{dt} &= k_{17} \left[ 1 + \frac{u(j,t)}{\sqrt{1+u(j,t)^2}} \right] - d_w wus(j,t) \\ 247 \quad u(j,t) &= h_w + T_{wy} y(j,t) \\ \frac{dy(j,t)}{dt} &= k_y L(j,t) - d_y y(j,t) \\ &\quad + D_y [y(j+1,t) - 2y(j,t) + y(j-1,t)] \end{aligned} \quad (5)$$

248 subject to the following boundary conditions:

$$\begin{aligned} L(1,t) &= L(15,t) = 1 \\ 249 \quad L(j,t) &= 0 \quad 2 \leq j \leq 14 \\ y(j,t) &= 0 \quad 1 \leq j \leq 15 \end{aligned} \quad (6)$$

250 The model was solved using the Euler predictor-corrector method. The simulation was done for  
 251 1,200,000 time steps of 0.05s which represents 16.6 hrs. The initial condition used in this work are:  
 252  $lfy(j,0) = 1$ ,  $ap1(j,0) = 0$ ,  $ag(j,0) = 0$ ,  $tfl1(j,0) = 0.1$  and  $wus(j,0) = 1$  for  $j = 1, 2, 3, \dots, 15$ .  
 253 Additionally:  $y(1,0) = y(2,0) = y(3,0) = y(13,0) = y(14,0) = y(15,0) = 1$  and  $y(j,0) = 0$  for  $j = 4, 5, 6,$   
 254  $\dots, 12$ ;  $L(1,0) = L(2,0) = L(3,0) = L(13,0) = L(14,0) = L(15,0) = 1$  and  $L(j,0) = 0$  for  $j = 4, 5, 6, \dots,$   
 255  $12$ .

256 In Table 1 we show the parameter values used in the model. We made parameter estimation by  
 257 randomly varying each individual parameter value reported in the second column of Table 1 in a  
 258 range of about  $\pm 10\%$  of its original value, and choosing those interval of values for which the model  
 259 output is stable. These intervals of values are presented in the third column of Table 1.

260

261

### 262 3 Results

263 The numerical integration of the set of equations postulated in the model leads to the results shown in  
264 Figure 2. In Figures 2a and 2b it is clear that the first genes that are switched *on* are *LFY* and *TFL1*.  
265 The activation level of these two genes is uniform along the presumptive floral meristem. As  
266 expected,  $LFY \gg TFL1$  at all times (see Table of Logical Rules in Espinosa-Soto et al., 2004) as  
267 required for floral induction.

268 Flower induction depends on numerous genes (~ 2000) that respond to light, and to external and  
269 internal signals. However, *LFY* and *API* are two of the most important downstream targets of flower  
270 meristem specification and are key markers of flower meristem identity (Pidkowich et al., 1999; Jack,  
271 2004; Boss et al., 2004). As we show in Figure 2c, before the new spatial pattern of the system is  
272 established, *API* is uniformly activated along the L1 cell layer, in response to *LFY* activation  
273 (Equation 2). *WUS* is activated in the center of the L1 cell layer under the action of an inhibitory  
274 signal *L* from the extremes of the layer (Jönsson et al., 2005).

275 In the model, *API* should be activated before *AG*, and the *WUS* pre-pattern must induce *AG*  
276 activation prior to *API* inhibition by *AG* in order to obtain the complete set of flower structures. In  
277 this form we obtain the sequence of events of gene activation): *LFY*, *API*, *AG* (Figure 2b, Figure 2c  
278 and Figure 2d) (Pidkowich et al., 1999). *TFL1* is turned *on* at the same time that *LFY* comes *on* and  
279 remains at a low and homogeneous level of activation throughout early stages of flower development  
280 (Figure 2d) (Espinosa-Soto et al., 2004).

281 *WUS* expression in the flower center blocks the inhibitory effect of *API* over *AG*, allowing the  
282 expression of the latter in this field centered at ~ cell 8 (Espinosa-Soto et al., 2004). *AG* is expressed  
283 in this field and exerts an increasing inhibitory effect on *API* as *AG* relative level of expression  
284 increases, according to Equation 2. Thus, these results from the model show that *this interplay, at the*  
285 *cellular level, given the WUS spatial pattern of activation in the flower center, is a necessary but not*  
286 *sufficient condition for the spatial patterning of the L1 cell layer of the SAM during the floral*  
287 *induction process*. As a result, this mechanism produces the expression of the class C MADS genes  
288 in the fourth whorl and the class A MADS-box genes in the first whorl. Class B genes are expressed  
289 in the cells between these two peaks of opposite activity (Figure 2d).

290 *WUS* pattern is due to the inhibitory signal *L* from the cells of the extreme of the L1 layer. Figure 2d  
291 is obtained when the signal *L* is present in cells 1, 2, 3, 13, 14 and 15. When the signal *L* is reduced to  
292 cell 1 in the left extreme, and to cell 15 in the right extreme ( $L(j,t) = 1$  for  $j = 1, 15$  and  $L(j,t) = 0$  for  
293  $1 < j < 15$ ) the qualitative form of the pattern shown in Figure 2d is conserved, but it becomes broader  
294 and asymmetric with respect to cell 8 (Figure 3). This numerical result indicates that the signal *L* is  
295 the primary factor that patterns the extent of the spatial expression of the *WUS* and *AG* genes, and  
296 breaks the initial system symmetry through the set up of a diffusible inhibitory signal *y* that is  
297 initially presented only in the extremes of the L1 cell layer (Jönsson et al., 2005) (Figure 2a). The  
298 molecular identity of the *L* and *y* signals still remains unclear (Jönsson et al., 2005). However, one  
299 possibility is that these inhibitory signals could be diffusible peptides of the CLV family (Alexeev et  
300 al., 2005; Sablowsky, 2009; Gruel et al., 2016). It is possible that the fields of mechanic and elastic  
301 forces also underlie positional information important for spatial patterning (see Barrio et al., 2010).

302 In Figure 2d we show the state of each of the 15 cells of the model at steady state conditions after the  
303 spatial patterning process of the presumptive floral meristem. As shown in Figure 1, the formation of  
304 floral structures depends on the correct set up of the four zones of gene expression configurations



305 (Álvarez-Buylla et al., 2010). Our model renders a spatio-temporal patterns of gene expression with a  
306 clearly defined A zone at the outer whorl, and a C zone of expression centered at the fourth whorl.  
307 The B zone lies between these two zones overlapping with A in the second and with C in the third  
308 whorls (Figures 2d and 3). This pattern mimics that found during early stages of *Arabidopsis* flower  
309 development, and we should remark that the entire dynamics of the system rests on the boundary  
310 conditions set at the extremes of the modeled domain of cells (see above paragraph).

311 Zone A is characterized by high levels of expression of *LFY* and *API*, and a low level of *TFL1*  
312 expression. Zone C has high levels of *WUS*, *AG* and *LFY* expression and low *TFL1* expression levels.  
313 Zone B has a combination of different levels of expression of the five genes. In this form, in each  
314 zone the complete network of 15 genes coupled to the continuous signal fields modeled here yields a  
315 spatio-temporal pattern that mimics that observed during early flower development (Espinosa-Soto et  
316 al., 2004). The minimal network modeled here is also useful to address the role of the intercellular  
317 movement of *LFY* that is a key factor during flower development (Figures 2d and 3).

318 Protein *LFY* can move among cells along the L1 cell layer (Wu et al, 2003). If we vary the coupling  
319 factor  $\varepsilon$  from 0 to a value of 10, we do not observe any change in the recovered spatial or temporal  
320 patterns concerning the level of expression of *LFY* itself, and also of *TLF1*, *API* and *AG*. This result  
321 suggests that free diffusion of *LFY* among cells is not critical for the observed spatial patterning of  
322 the key regulatory genes involved in early flower development (Wu et al, 2003), but *LFY* is the  
323 chemical force that drives the reaction processes that induce the instability of the chemical field  
324 during the symmetry breaking process (Equations 1-3, Figure 1b).

325 In order to further address the role of *LFY* diffusion in sustaining the steady state dissipative  
326 structure formed after the spatial patterning of the system emerges, we made a series of simulations  
327 in which  $\varepsilon$  was varied randomly every 50 s, the final dissipative structure is not altered, indicating  
328 that the interactions responsible for the preservation of this structure are independent of the flux of  
329 *LFY* between cells down the L1 layer. Furthermore, if we allow random values of  $\varepsilon$  among L1 cells  
330 the system evolves to the same dissipative structure. These results support the idea that *the role of*  
331 *LFY in the spatial patterning process of L1 during flower development does not depend on its*  
332 *diffusive properties but on its flower meristem identity function in interaction with several other*  
333 *components of the flower organ specification GRN, including its regulatory interactions with the*  
334 *ABC genes, and in response to several inductive factors* (Pidkowich et al., 1999; Jack, 2004; Scheres,  
335 1998).

## 336 4 Discussion

337 Reaction-diffusion processes have been shown to be important components of the mechanisms  
338 underlying the emergence of ordered spatio-temporal patterns of gene expression patterns in  
339 biological systems. The pioneer work of Turing (1952), and the posterior works of Prigogini and  
340 Nicolis (1967), Prigogine and Lefever (1968), and Gierer and Meinhardt (1972), have shown that  
341 chemical dissipative structures form fields that are a source of positional information (Wolpert,  
342 1994). However, it is no clear yet how this positional information is interpreted by gene networks;  
343 although some attempts have been done in this direction in the case of animal systems (Currie and  
344 Ingham, 1998; Jaeger et al., 2004).

345 In the particular case of *Arabidopsis* flower development, recent works have tried to link the Boolean  
346 dynamics of the genetic network for floral determination proposed by Espinosa-Soto et al. (2004),  
347 with the ABC model of flower development. However, the ABC model does not provide a dynamical

348 explanation for the emergence and maintenance of the steady-state spatial patterns of gene expression  
349 that characterize each primordial floral organ cell type as a result of ABC and non-ABC gene  
350 interactions.

351 Espinosa-Soto et al. (2004), proposed a discrete dynamic model of the necessary and sufficient set of  
352 ABC and non-ABC genes interactions to recover the gene configurations that are characteristic of the  
353 four floral organ cell-fates. This model postulates a network of interaction among 15 genes (nodes).  
354 The model shows that all possible initial conditions lead the system to a few steady states of gene  
355 activity that match the gene expression profiles observed in four regions of the inflorescence  
356 meristem (with neither *UFO* or *WUS*, with both or either one of these two factors), and in each of the  
357 four types of floral organ primordial cells. A conclusion from this model is that floral cell fate  
358 determination is determined by the structure and dynamics of the GRN proposed, which can be  
359 considered as a robust developmental module underlying cell-fate determination during early stages  
360 of flower development. This model cannot be used to address the mechanisms underlying the  
361 emergence of positional information and the spatio-temporal patterns during flower development.

362 A stochastic version of the dynamics of the gene network proposed by Espinosa-Soto et al. (2004), to  
363 explore cell-type transitions is presented by Álvarez-Buylla et al. (2008). Although the basic  
364 dynamical features of the network remain Boolean, the introduction of different uncertainty levels in  
365 the updating of the logical rules mimics the effect of noise on the GRN that can be due to external  
366 fluctuations or internal noise due to sampling errors in the transcription factors involved. The model  
367 exhibits recovers the temporal pattern of cell-fate transitions observed during flower development,  
368 but does not include a spatially explicit domain.

369 In order to explore the emergence of positional information and spatial patterning during flower  
370 development, the Boolean dynamics of the GRN proposed by Espinosa-Soto et al. (2004), is coupled  
371 to elastic fields in the floral primordium (Barrio et al., 2010). The main hypothesis in this work is that  
372 there is at least one mechanical field that breaks the symmetry of the floral primordium at a given  
373 time during early stages of flower development. This field provides the positional information  
374 required for the process of cell differentiation in different spatial domains of the primordium as a  
375 result of the dynamical coupling via a signal transduction mechanism that, in turn, acts directly upon  
376 the gene regulatory network underlying cell-fate decisions within cells. It is then the feedback  
377 between the intracellular GRN and such extra-cellular signals and fields that underlies positional  
378 information and spatial patterning. This model is able to recover the multi-gene configurations  
379 characteristic of sepal, petal, stamen, and carpel primordial cells arranged in concentric rings, in a  
380 similar pattern to that observed during actual floral organ determination. An important caveat of this  
381 model is that it assumes the existence of a field  $\phi$  that *a priori* breaks the symmetry of the floral  
382 meristem. The model is a hybrid one, in which the equations of the mechanical field are continuous,  
383 and the states of the GRN are discrete.

384 A general theory for genotype to phenotype mapping is proposed by Villarreal et al. (2012). In this  
385 work the authors have put forward an analytical derivation of the probabilistic epigenetic landscape  
386 for an N-dimensional genetic regulatory network grounded on experimental data. This method was  
387 applied to the *Arabidopsis thaliana* floral organ specification GRN used in Espinosa-Soto et al.,  
388 (2004) successfully recovering the steady-state gene configurations characteristic of primordial cells  
389 of each floral organ type in wild-type and ABC mutants, as well as their temporal patterns of  
390 transitions that mimics that observed in actual flower development when ABC gene decay rates are  
391 relatively similar to those which have been reported experimentally.

392 Some of the previous modeling approaches have attempted to integrate the GRN underlying floral  
393 organ specification with coupling mechanisms that recover observed spatial patterns during early  
394 flower development. An additional effort to model the mechanisms underlying floral organ  
395 specification is presented in Wang et al. (2014). In this paper, authors use a continuous approach and  
396 specifically consider the dynamical response of *API* and *LFY* to photoperiod.

397 Previous studies have shown, using flower development as study system, that *the structure and*  
398 *dynamics of the floral organ specification GRN underlies the attractors attained during its temporal*  
399 *evolution*, and that the kinetic rates of interaction between their nodes are important for determining  
400 the timing and responsiveness of the GRN being considered. Furthermore, additional studies have  
401 shown that the spatial interactions among cells through short or large-range diffusible signals is a  
402 necessary condition for the emergence of dissipative structures in any multi-cellular system with  
403 nonlinear dynamics (Prigogine and Nicolis, 1967). In this study we have explored the link between  
404 the GRN dynamics and the emergence of apical meristem regions with specific positional  
405 information that had remained unclear from previous studies.

406 We explored how the nonlinear interaction between the protein products of the floral gene regulatory  
407 network yields the instability of the chemical fields in the flower primordium, and how the diffusive  
408 properties of some of these proteins drive the system into a steady stable dissipative structure with a  
409 pattern that coincides with that observed during floral organ specification in early flower  
410 development.

411 Hence, we proposed without *a priori* assumptions concerning the symmetry of the L1 sheet of cells,  
412 *that the subnet of five nodes WUS, API, AG, LFY, and TFL1, comprise a minimal GRN necessary for*  
413 *the initial patterning of the floral meristem* (Figures 2d and 3). The necessary condition for the  
414 patterning of the floral meristem into the A, B and C zones is the pre-patterns of WUS. The  
415 dynamical properties of this net are determined by the kinetic parameters of the strength and timing  
416 of the interactions among nodes, and by the diffusive properties of LFY and the inhibitory signal  $y$ .

417 In our work, the molecular interactions that determine floral organ induction are modeled with a set  
418 of coupled nonlinear differential equations, while the interaction among the L1 sheet of cells, due to  
419 the diffusion of LFY and signal  $y$ , is modeled with the discrete version of the Laplacian. The  
420 intensity of the coupling among the floral meristem cells is determined by the values of the coupling  
421 coefficients  $\varepsilon$  and  $Dy$  (See Model section).

422 Our model seeks to elucidate how the nonlinear interaction between the protein products of WUS,  
423 *LFY, TFL1, AG* and *API* may be involved in patterning the floral meristem and if such minimal GRN  
424 is sufficient to achieve so. For this purpose we used a linear arrange of 15 cells that extends along the  
425 diameter of the four whorls and we initialize our simulations by setting homogeneous initial  
426 conditions for all the cells of this array (Figure 2b). We couple this homogeneous chemical field to  
427 the reaction-diffusion process that produces the WUS spatial pre-pattern centered at whorl 4 (Jönsson  
428 et al., 2005) (Equation 5). In the work of Jönsson et al. (2005) the forces that pattern WUS spatial  
429 distribution are taken as unknown signals  $L$  and  $y$  from the extremes of the L1 sheet. In the work of  
430 Alexeev et al. (2005) it is suggested that at least one of the unknown signals could correspond to the  
431 negative regulatory effect that CLV3 has over WUS spatial distribution. The second inhibitory signal  
432 could be AG, which has been demonstrated to negatively regulate *WUS* spatial pattern of expression  
433 (Liu et al., 2011).

434 As we mentioned before, LFY has diffusive properties that could take part in the definition of the  
435 ABC zones. However, as we show in the Results section, random variations in the coupling  
436 coefficient  $\varepsilon$  (see Results section) that stands for intercellular LFY movement along the L1 sheet does  
437 not affect the final spatial pattern of the system. This result suggests that LFY diffusion is not  
438 necessary for the spatial patterning of A, B and C functions in the L1 layer. In this form, the entire  
439 spatial dynamics depends on the diffusion of the inhibitory signals  $L$  and  $y$  discussed above (see  
440 Figure 3). Moreover, the numerical solution of the model shows that, for the particular set of  
441 parameters values shown in Table 1, WUS pre-pattern is a *necessary but not sufficient condition* for  
442 the patterning of the floral meristem into the four spatially distributed chemical fields postulated by  
443 the ABC model.

444 The model reproduces the initial sequence of events during floral organ specification. This sequence  
445 is formed by an initial expression of the genes  $API$ ,  $LFY$  and  $TFL1$  in all cells (Figure 2b), followed  
446 by the emergence of the  $WUS$  pattern. The regional activation of  $WUS$  centered at the fourth whorl  
447 breaks the homogeneity of the initial chemical field of the system (Figures 2b and 2c). Once the  
448  $WUS$  pattern is formed,  $AG$  is expressed and exerts its inhibitory action on  $API$  in the center of the  
449 cell array, fixing  $API$  expression at the extremes (first whorl) of the floral meristem (Figure 2d). In  
450 order to obtain the correct qualitative pattern of floral induction, it is necessary to take into account  
451 the mutual inhibition loop formed by  $API$  and  $AG$  (Espinosa-Soto et al., 2004). Furthermore, this  
452 loop seems to be necessary for the stability of the pattern (see Results section).

453 Experimental data indicates that  $WUS$  excludes  $API$  expression from the fourth whorl and thus  
454 activates  $AG$ . The model assumes that  $AG$  is activated prior to  $API$  exclusion from the fourth whorl.  
455 But if the  $API$  exclusion function (Equation 2) of the model is written in terms of  $WUS$  instead of  
456  $AG$ , the qualitative form of the final pattern of floral organ induction is not altered, indicating that the  
457 patterning of the system does not depend if either  $WUS$  and  $AG$  genes exerts the inhibitory action  
458 over  $API$ . However, the floral organ specification GRN proposed in Espinosa-Soto et al. (2004),  
459 states that is  $AG$  who inhibits  $API$ .

460 In this form, from the numerical solution of our model it is possible to obtain a chemical dissipative  
461 structure that patterns the linear array of 15 L1 cells into three well defined zones of differential  
462 expression of the five genes of the subnet modeled here. Each zone (whorl) has positional  
463 information that is interpreted in the form of a specific combination of the A, B and C genes that  
464 coincides with the necessary conditions for organ determination in each whorl as postulated by the  
465 ABC model.

466 Finally, it is important to mention that in this work we did not perform ABC mutant simulations  
467 because we used a subnet of only five of the 15 nodes of the floral organ specification GRN proposed  
468 before (Espinosa-Soto et al., 2004; Barrio et al., 2010). The interaction of these five nodes with the  
469 rest is important to recover the floral patterns observed in mutant plants.

## 470 **5 Conclusions**

471 The aim of our computational model is to propose a probable mechanism for the spatial patterning  
472 process of the presumptive floral meristem based on the mutual exclusive interaction at a cellular  
473 level of the  $API$  and  $AG$ , and a spatial pre-pattern of  $WUS$  (Jönsson et al., 2005) centered at the  
474 fourth whorl, which is a necessary but not sufficient condition for floral organ determination. Our  
475 model has also enabled us to show that although experiments with  $LFY:GFP$  hybrids clearly show  
476 that LFY can effectively move from cell to cell along the L1 sheet of cells of the SAM (Wu et al.,

477 2003), LFY diffusion has no effect on the onset or maintenance of the peaks of *API* and *AG* activity  
478 predicted by the model, which mimic the ABC patterns.

479 The dissipative structure obtained from the numerical solution of the model shows two opposite  
480 peaks of activity at the first and fourth whorls formed by *API* and *AG*, respectively, that define the A  
481 and C zones of floral induction. The B zone lies in the middle of these peaks and represents different  
482 combination of expression of the five genes in whorls 2 and 3. Thus, the numerical solution of the  
483 model proposed in this work leads to the onset of the four chemical fields that contain the positional  
484 information required for the differential expression of the A, B, and C genes according to the ABC  
485 model for floral organ specification. These four coupled chemical fields form a dissipative structure  
486 that resembles the floral organization observed during the early stages of development in the floral  
487 primordium.

488 Finally, the model presented in this work suggest five main points susceptible to be experimentally  
489 tested: a) LFY diffusion does not take a fundamental part in the patterning of the floral meristem  
490 *along* the L1 sheet of cells; b) the pattern obtained from the model defines the ABC zones of gene  
491 expression according to the ABC model of flowering; c) WUS pre-pattern *is a necessary but not a*  
492 *sufficient condition* for the correct patterning of the L1 layer of the floral meristem; d) the spatio-  
493 temporal distribution of *LFY*, *API*, *AG*, and *TFL1* products along the L1 sheet can effectively be a  
494 necessary but not sufficient condition for floral organ determination, once the WUS pre-pattern has  
495 been established; e) exists, at least, a set of parameters values for which we can obtain a solution of  
496 the model that resembles the experimentally observed ABC pattern.

## 497 **6 Conflict of Interest**

498 The authors declare that the research was conducted in the absence of any commercial or financial  
499 relationships that could be construed as a potential conflict of interest.

## 500 **7 Data Availability Statement**

501 The original contributions presented in the study are included in the article/supplementary material;  
502 further inquiries can be directed to the corresponding author.

## 503 **8 Author Contributions**

504 Both authors made equal substantial contributions to this manuscript.

## 505 **9 Funding**

506 Financial support for this work was from PRODEP to JD..

## 507 **10 Acknowledgments**

508 We thank Erika Juárez and Diana Romo for technical and logistical assistance. We also thank Yamel  
509 Ugartechea for Figure 1.

510

511

512

513 **11 References**

- 514 Alexeev, D.V., Ezhova, T.A., Kozloy V.N., Kudryaytsev, V.B., Nosov, M.V., Penin, A.A., Skryabin,  
515 K.G., Choob, V.V., Shulga, O.A., and Shestakov, S.V. (2005). Spatial pattern formation in the flower  
516 of *Arabidopsis thaliana*: mathematical modeling. *Doklady Biological Sciences* 401:133-135.
- 517 Alvarez-Buylla, E.R., Chaos, A., Aldana, M., Benítez, M., Cortes-Poza, Y., Espinosa-Soto, C.,  
518 Hartasánchez, D.A., Lotto, R.B., Malkin, D., Escalera-Santos, G.J., and Padilla-Longoria, P. (2008).  
519 Floral morphogenesis: stochastic explorations of a gene network epigenetic landscape. *PLoS ONE*  
520 3: e3626. doi: 10.1371/journal.pone.0003626
- 521 Alvarez-Buylla, E.R., Liljegren, S.J., Pelaz, S., Gold, S.E., Burgeff, C., Dittal, G.S., Vergara-Silva,  
522 F., and Yanofsky, M.F. (2000). MADS-box gene evolution beyond flowers: expression in pollen,  
523 endosperm, guard cells, roots and trichomes. *The Plant Journal* 24:457-466. doi: 10.1046/j.1365-  
524 313x.2000.00891.x.
- 525 Alvarez-Buylla, E.R., Benítez, M., Corvera-Poiré, A., Chaos, A., de Foltier, S., Gamboa de Buen, A.,  
526 Garay-Arroyo, A., García-Ponce, B., Jaimes-Miranda, F., Pérez-Ruiz, R.V., Piñeyro-Nelson, A., and  
527 Sánchez-Corrales, Y.E. (2010). Flower development. *The Arabidopsis Book* 8: e0127
- 528 Barrio, R.A., Hernandez-Machado, A., Varea, C., Romero-Arias, J., Alvarez-Buylla, E.R. (2010).  
529 Flower development as an interplay between dynamical physical fields and genetic networks. *PLoS*  
530 *ONE* 5: e13523. doi:10.1371/journal.pone.0013523
- 531 Boss, P.K., Bastow, R.M., Mylne, J.S., and Dean, C. (2004). Multiple Pathways in the Decision to  
532 Flower: Enabling, Promoting, and Resetting. *The Plant Cell* 16: S18–S31. doi:  
533 <https://doi.org/10.1105/tpc.015958>
- 534 Coen, E.S., and Meyerowitz, E.M. (1999). The war of whorls: genetic interactions controlling flower  
535 development. *Nature* 353:31-37. doi: 10.1038/353031a0
- 536 Currie, P.D., and Ingham, P.W. (1998). The generation and interpretation of positional information  
537 within the vertebrate myotome. *Mechanisms of Development* 73:3-21. doi: 10.1016/s0925-  
538 4773(98)00036-7
- 539 Dupoy, L., Mackenzie, J., Rudge, T., and Haseloff, J. (2008). A System for Modelling Cell –Cell  
540 Interactions during Plant Morphogenesis. *Annals of Botany* 101: 1255–1265. doi:  
541 <https://doi.org/10.1093/aob/mcm235>
- 542 Durfee, T., Roe, J.L., Sessions, R.A., Inouye, C., Serikawa, K., Feldmann, A., Weigel, D., and  
543 Zambryski, P.C. (2003). The F-box-containing protein UFO and AGAMOUS participate in  
544 antagonistic pathways governing early petal development in *Arabidopsis*. *PNAS* 100:8571-8576. doi:  
545 10.1073/pnas.1033043100
- 546 Espinosa-Soto, C., Padilla-Longoria, P., and Alvarez-Buylla, E.R. (2004). A gene regulatory network  
547 model for cell-fate determination during *Arabidopsis thaliana* flower development that is robust and  
548 recovers experimental gene expression profiles. *The Plant Cell* 16:2923-2939. doi:  
549 <https://doi.org/10.1105/tpc.104.021725>
- 550 Gierer, A., and Meinhardt, H. (1972). A theory of biological pattern formation. *Kybernetik* 12:30-39.  
551 doi: <https://doi.org/10.1007/BF00289234>
- 552 Goto, K., and Meyerowitz, E.M. (1994). Function and regulation of the *Arabidopsis* floral homeotic  
553 gene PISTILLATA. *Genes Dev* 8: 1548-1560. doi: 10.1101/gad.8.13.1548

- 554 Gruel, J., Landrein, B., Tarr, P., Schuster, C., et al. (2016). An epidermis-driven mechanism positions  
555 and scales stem cell niches in plants. *Sci. Adv.* 2 : e1500989. doi: 10.1126/sciadv.1500989
- 556 Haspolat, E. Huard, B. and Angelova, M. (2019). Deterministic and Stochastic Models  
557 of *Arabidopsis thaliana* Flowering. *Bulletin of Mathematical Biology* 81: 277–311. doi:  
558 <https://doi.org/10.1007/s11538-018-0528-x>
- 559 Hepworth, S.R., Klenz, J.E., and Haughn, G.W. (2005). UFO in the *Arabidopsis* inflorescence apex  
560 is required for floral-meristem identity and bract suppression. *Planta* 223: 769–778. doi:  
561 10.1007/s00425-005-0138-3
- 562 Ikeda, M., Mitsuda, N., and Ohme-Takagi, M. (2009). *Arabidopsis* WUSCHEL is a bifunctional  
563 transcription factor that acts as a repressor in stem cell regulation and as activator in floral patterning.  
564 *The Plant Cell* 21: 3493-3505. doi: 10.1105/tpc.109.069997
- 565 Ingram, G.C. (2004). Between the sheets: inter-cell-layer communication in plant development. *Phil.*  
566 *Trans. R. Soc. Lond. B* 359: 891–906. doi: 10.1098/rstb.2003.1356
- 567 Jack, T. (2004). Molecular and Genetic Mechanisms of Floral Control. *The Plant Cell* 16: s1-s17.  
568 doi: <https://doi.org/10.1105/tpc.017038>
- 569 Jaeger, J., Surkova, S., Blagov, M., Janssens, H., Kosman, D., Kozlov, K.N., Myasnikova, M.E.,  
570 Vanario-Alonso, C.E., Samsonova, M., Sharp, D.H., and Reinitz, J. (2004). Dynamic control of  
571 positional information in the early *Drosophila* embryo. *Nature* 430: 368-371. doi:  
572 10.1038/nature02678
- 573 Jönsson, H., Heisler, M., Reddy, G.V., Agrawar, V., Gor, V., Shapiro, B.E., Mjölssness, E., and  
574 Meyerowitz, E.M. (2005). Modeling the organization of the WUSCHEL expression domain in the  
575 shoot apical meristem. *Bioinformatics* 21: Suppl 1, i232-i240. doi: 10.1093/bioinformatics/bti1036
- 576 Liu, X., Kim, Y.J., Müller, R., Yumu, R.E., Liu, C., Pan, Y., Cao, X., Goodrich, J., and Chen, X.  
577 (2011). *AGAMOUS* Terminates Floral Stem Cell Maintenance in *Arabidopsis* by Directly  
578 Repressing *WUSCHEL* through Recruitment of Polycomb Group Proteins. *The Plant Cell* 23: 3654-  
579 3670. doi: 10.1105/tpc.111.091538
- 580 Maizel, A., and Weigel, D. (2004). Temporally and spatially controlled induction of gene expression  
581 in *Arabidopsis thaliana*. *The Plant Journal* 38:164-171. doi: <https://doi.org/10.1111/j.1365->  
582 313X.2004.02027.x
- 583 Mandel, M.A., Bowman, J.L., Kempin, S.A., Ma, H., Meyerowitz, E.M., and Yanofsky, M.F. (1992).  
584 Manipulation of flower structure in transgenic tobacco. *Cell* 71:133-143. doi:  
585 <https://doi.org/10.1007/BF00013745>
- 586 Mendoza, L., Thieffry, D., and Alvarez-Buylla, E.R. (1999). Genetic control of flower  
587 morphogenesis in *Arabidopsis thaliana*: a logical analysis. *Bioinformatics* 15:593. doi:  
588 10.1093/bioinformatics/15.7.593
- 589 Moyroud, E., Gómez-Minguet, E., Ott, F., Yant, L., Posé, D., Monniaux, M., Blanchet, S., Bastien,  
590 O., Thévenon, E., Weigel, D., Schmid, M., and Parcy, F. (2001). Prediction of regulatory interactions  
591 from genome sequences using a biophysical model for the *Arabidopsis* LEAFY transcription factor.  
592 *The Plant Cell* 23:1293-1306. doi: <https://doi.org/10.1105/tpc.111.083329>
- 593 Ng, M., and Yanofsky, M.F. (2001). Activation of the *Arabidopsis* B Class Homeotic Genes by  
594 *APETALIA1*. *The Plant Cell* 13:739-753. doi: 10.1105/tpc.13.4.739

- 595 Okamuro, J.K., Den Boer, B.G.W., Lotys-Prass, C., Szeto, W., and Jofuku, K.D. (1996). Flowers into  
596 shoots: Photo and hormonal control of a meristem identity switch in *Arabidopsis*. *Proc. Natl. Acad.*  
597 *Sci. USA* 93: 13831-13836. doi: <https://doi.org/10.1073/pnas.93.24.13831>
- 598 Parcy, F., Bomblies, K., and Weigel, D. (2002). Interaction of LEAFY, AGAMOUS and  
599 TERMINAL FLOWER1 in maintaining floral meristem identity in *Arabidopsis*. *Development* 129:  
600 2519-2527.
- 601 Pelaz, S., Ditta, G.S., Baumann, E., Wisman, E., and Yanofsky, M.F. (2000). B and C floral organ  
602 identity functions require *SEPALLATA* MADS box genes. *Nature* 405: 200-203. doi:  
603 [10.1038/35012103](https://doi.org/10.1038/35012103)
- 604 Pelaz, S., Tapia-Lopez, R., Alvarez-Buylla, E.R., and Yanofsky, M.F. (2001). Conversion of leaves  
605 into petals in *Arabidopsis*. *Curr. Biol.* 11: 182-184. doi: [10.1016/s0960-9822\(01\)00024-0](https://doi.org/10.1016/s0960-9822(01)00024-0)
- 606 Pidkowich, M.S., Kienz, J.E., and Haughn, G.W. (1999). The making of a flower: control of floral  
607 meristem identity in *Arabidopsis*. *Trends in Plant Science* 4: 64-70. doi: [10.1016/s1360-](https://doi.org/10.1016/s1360-1385(98)01369-7)  
608 [1385\(98\)01369-7](https://doi.org/10.1016/s1360-1385(98)01369-7)
- 609 Prigogine, I., and Nicolis, G. (1967). On symmetry-breaking instabilities in dissipative systems. *J.*  
610 *Chem. Phys.* 46:3542-3550. doi: [10.1063/1.1841255](https://doi.org/10.1063/1.1841255)
- 611 Prigogine, I., and Lefever, R. (1968). Symmetry breaking instabilities in dissipative systems. II. *J.*  
612 *Chem. Phys.* 48:1695-1700. doi: <https://doi.org/10.1063/1.1668896>
- 613 Sablowsky, R. (2009). Cytokinin and WUSCHEL tie the knot around plant stem. *PNAS* 106:16016-  
614 16017.
- 615 Samach, A., Klenz, J.E., Kohalmi, S.E., Risseeuw, S.E., Haughn, G.W., and Crosby, W.L. (1999).  
616 The UNUSUAL FLORAL ORGANS gene of *Arabidopsis thaliana* is an F-box protein required for  
617 normal patterning and growth in the floral meristem. *The Plant Journal* 20:433-445.  
618 doi: [10.1046/j.1365-3113x.1999.00617.x](https://doi.org/10.1046/j.1365-3113x.1999.00617.x)
- 619 Scheres, B. (1998). A LEAFY link from outer space. *Nature* 395: 545-547. doi:  
620 <https://doi.org/10.1038/26858>
- 621 Sessions, A., and Yanofsky, M.F. (2000). Cell-Cell Signaling and Movement by the Floral  
622 Transcription Factors LEAFY and APETALA1. *Science* 289: 779-781. doi:  
623 [10.1126/science.289.5480.779](https://doi.org/10.1126/science.289.5480.779)
- 624 Stewart, D., Graciet, E., and Wellmer, F. (2016). Molecular and regulatory mechanisms controlling  
625 floralorgan development. *The FEBS Journal* 283:1823–1830. doi:  
626 <https://doi.org/10.1111/febs.13640>
- 627 Traas, J., and Vernoux, T. (2002). The shoot apical meristem: the dynamics of stable structure. *Phil.*  
628 *Trans. R. Soc. Lond. B* 357: 737-747. doi: [10.1098/rstb.2002.1091](https://doi.org/10.1098/rstb.2002.1091)
- 629 Turing, A.M. (1952). The chemical basis of morphogenesis. *Philosophical Transactions of the Royal*  
630 *Society of London. Series B, Biological Sciences* 237:37-72. doi:  
631 <https://doi.org/10.1098/rstb.1952.0012>
- 632 Villarreal, C., Padilla-Longoria, P., and Alvarez-Buylla, E.R. (2012). General Theory of Genotype to  
633 Phenotype Mapping: Derivation of Epigenetic Landscapes from N-Node Complex Gene Regulatory  
634 Networks. *Physical Reviews Letters* 109: 118102. doi: [10.1103/PhysRevLett.109.118102](https://doi.org/10.1103/PhysRevLett.109.118102)



635 Wang, C.C.N., Chuang, P., Ng, K., Chang, C., Sheu, P.C.Y., and Tsai, J.P. (2014). A model  
636 comparison study of the flowering time regulatory network in *Arabidopsis*. *BMC Systems Biology*  
637 8:15. doi: <https://doi.org/10.1371/journal.pcbi.1007671>

638 Wolpert, L. (1994). Positional information and pattern formation in development. *Developmental*  
639 *Genetics* 15:485-490. doi: 10.1002/dvg.1020150607

640 Wu, X., Dinneny, J.R., Crawford, K.M., Rhee, Y., Citovsky, V., Zambryski, P.C., and Weigel, D.  
641 (2003). Modes of intercellular transcription factor movement in the *Arabidopsis* apex. *Development*  
642 130: 3735-3745. doi: 10.1242/dev.00577

643

## 644 12 Figures Captions

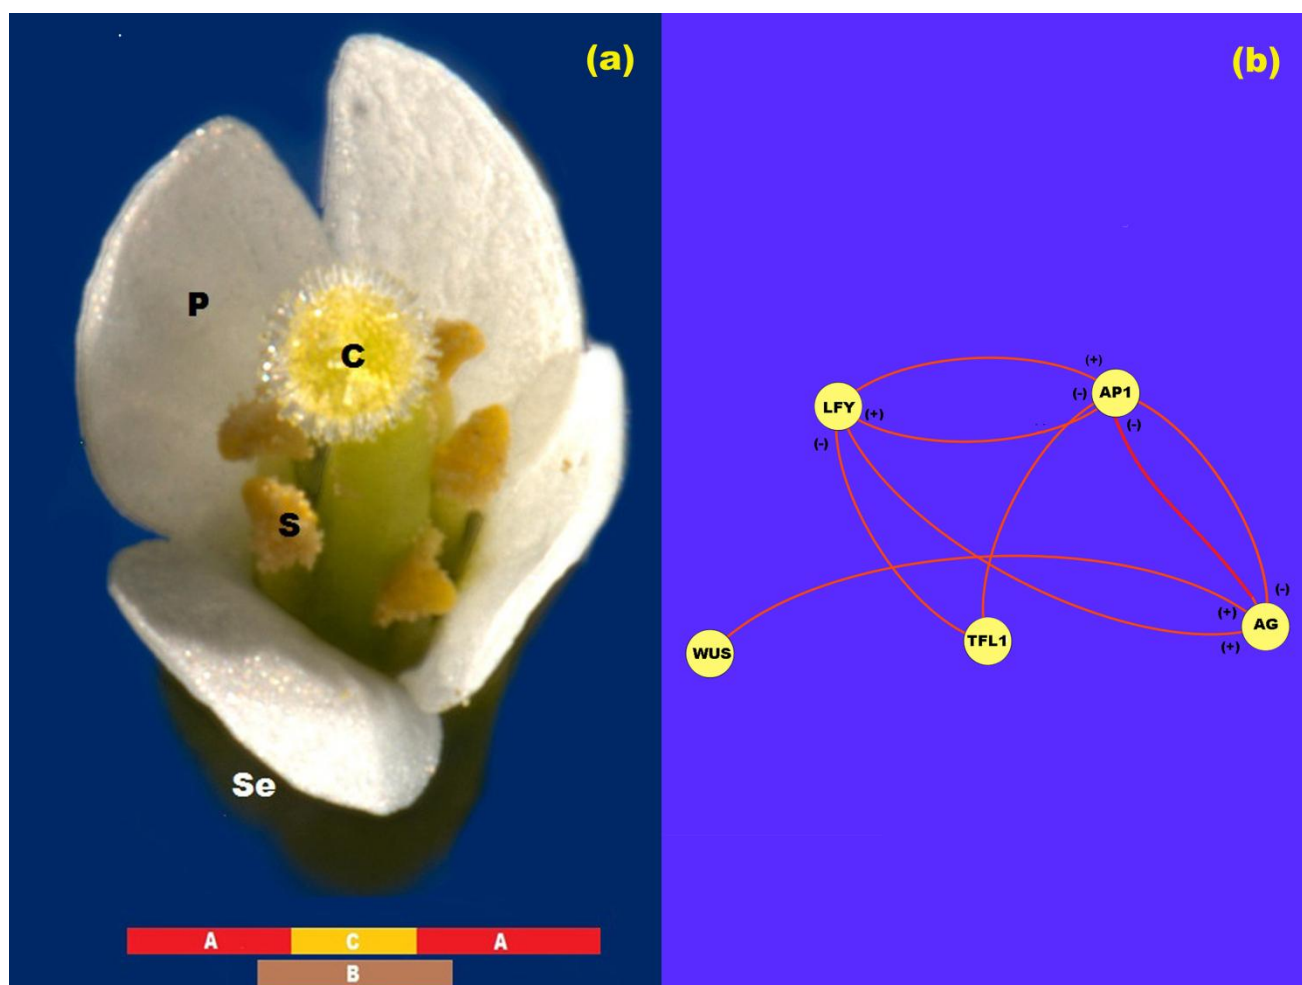

645

646

647 **Figure 1 - ABC model of flowering.** a) ABC model of flowering for *Arabidopsis*. In this figure *se*:  
648 sepals; *p*: petals; *s*: stamen and *c*: carpel. b) Network representation of the interaction between the  
649 proteins LFY, AP1, TFL1, AG and WUS. In this Figure (+) represents activation and (-) represents  
650 inhibition.

651

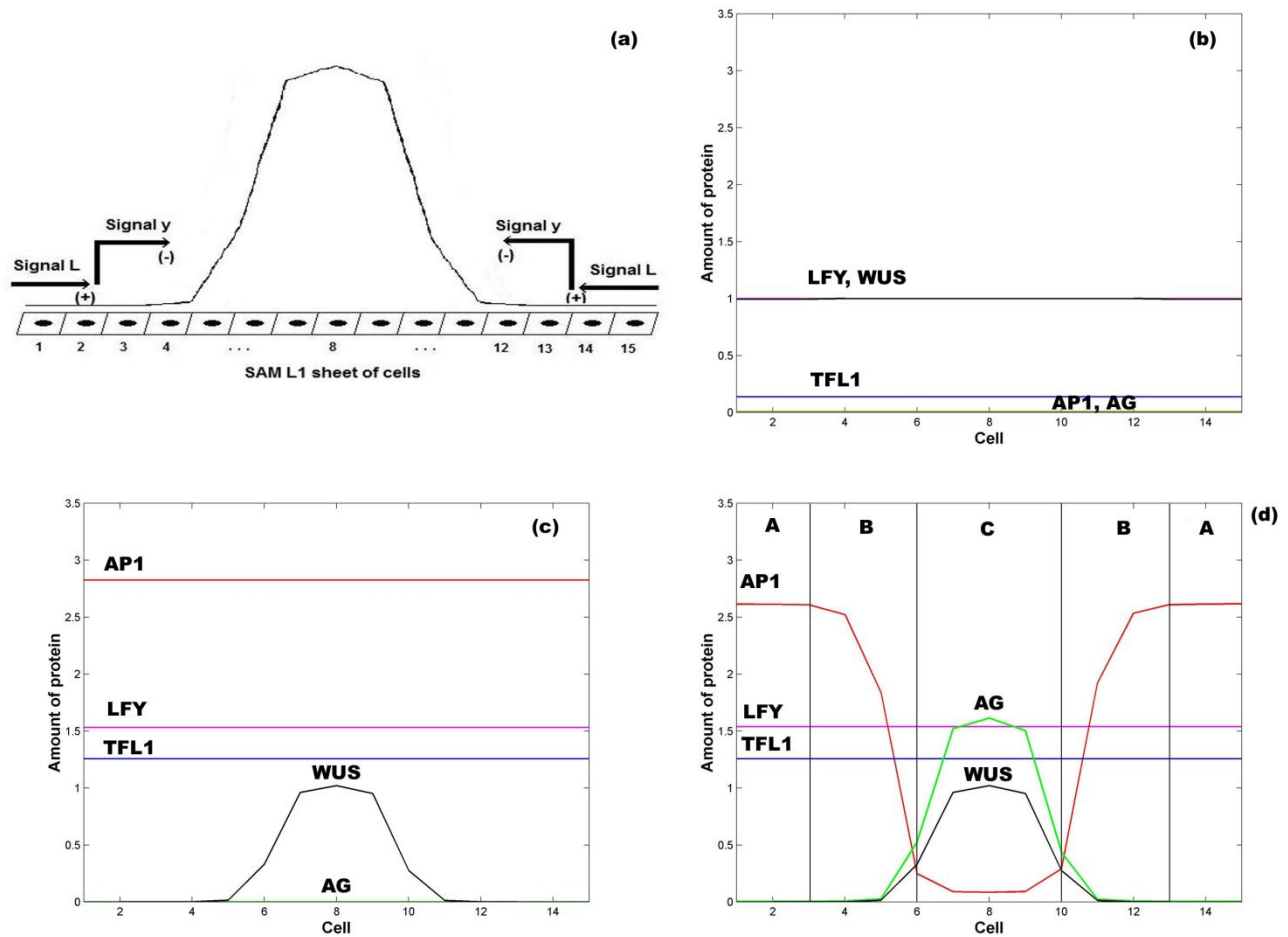

652

653 **Figure 2 - Emergence of the ABC zones of flower organ determination.** a) WUS pre-pattern is the  
 654 result of the action of the inhibitory signal  $L$  from the extremes of the SAM L1 sheet that induces the  
 655 activation of the inhibitory chemical signal  $y$  that restricts  $WUS$  expression to the inner whorl of the  
 656 floral meristem. In the model we represent the floral meristem as a linear array of 15 cells that  
 657 crosses the diameter of the four whorls. b) Initial homogeneous spatial distribution of the chemical  
 658 fields at the beginning of the simulation, LFY (red line), TFL1 (yellow line), AP1 (brown line) AG  
 659 (black line) and WUS (blue line); c) WUS pattern (blue line) arises at the center of the floral  
 660 meristem after  $\sim 1$  h; d) the initial homogenous state of the floral meristem is completely broken after  
 661  $\sim 16$  hours. AG is expressed at the center of the meristem (black line) and its presence moves AP1  
 662 away from this zone. In consequence, the floral meristem has been patterned into three well defined  
 663 zones of gene expression. In all Figures  $\varepsilon = 5$ . In all panels  $L(1) = L(2) = L(3) = L(13) = L(14) =$   
 664  $L(15) = 1$ , and  $L(j) = 0$  for  $4 \leq j \leq 12$ ; in similar form:  $y(1) = y(2) = y(3) = y(13) = y(14) =$   
 665  $y(15) = 1$  and  $y(j) = 0$  for  $4 \leq j \leq 12$ .

666

667

668

669

670

671

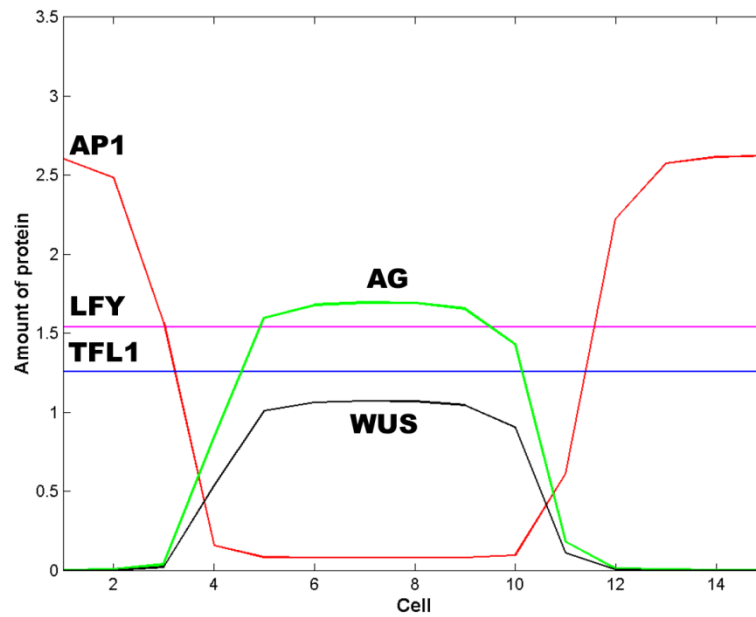

672

673

674

675 **Figure 3 – Effect of the spatial extent of the inhibitory signals  $L$  and  $y$ .** In this Figure  $L = 1$  and  $y$   
676  $= 1$  for cells 1 and 15;  $L = 0$  and  $y = 0$  otherwise. The effect of decrease the spatial extent of the  
677 inhibitory signals  $L$  and  $y$  is to pattern the floral meristem into a spatio-temporal stable dissipative  
678 structure, which becomes broader and asymmetric with respect to cell 8 and resembles an altered  
679 floral structure. In this Figure  $t = 16$  h and  $\varepsilon = 5$ .

680

681

682

683

684

685

686

687

688

689

690

691

692

693

694

695 **13 Table I**

696 **Table 1 - Parameter values for the spatial ABC patterning model of flowering**

697

| Parameter                         | Value in the Model        | Interval of Parameter Values |
|-----------------------------------|---------------------------|------------------------------|
| $k_1$                             | $0.03 \mu\text{M s}^{-1}$ | [0.03, 0.035]                |
| $k_2$                             | $0.02 \text{ s}^{-1}$     | [0.02, 0.023]                |
| $k_3$                             | $0.02 \text{ s}^{-1}$     | [0.015, 0.02]                |
| $k_4$                             | $0.04 \text{ s}^{-1}$     | [0.035, 0.04]                |
| $k_5$                             | $0.09 \mu\text{M s}^{-1}$ | [0.9, 1.5]                   |
| $k_6$                             | $0.05 \text{ s}^{-1}$     | [0.05, 0.07]                 |
| $k_7$                             | $0.02 \text{ s}^{-1}$     | [0.01, 0.02]                 |
| $k_8$                             | $0.05 \text{ s}^{-1}$     | [0.04, 0.05]                 |
| $k_9$                             | $0.08 \text{ s}^{-1}$     | [0.08, 0.5]                  |
| $k_{10}$                          | $0.025 \text{ s}^{-1}$    | [0.025, 0.05]                |
| $k_{11}$                          | $0.03 \text{ s}^{-1}$     | [0.01, 0.03]                 |
| $k_{12}$                          | $0.05 \text{ s}^{-1}$     | [0.01, 0.05]                 |
| $k_{13}$                          | $0.9 \mu\text{M s}^{-1}$  | [0.7, 0.9]                   |
| $k_{14}$                          | $0.08 \text{ s}^{-1}$     | [0.07, 0.08]                 |
| $k_{15}$                          | $0.03 \text{ s}^{-1}$     | [0.03, 0.08]                 |
| $k_{16}$                          | $0.55 \text{ s}^{-1}$     | [0.55, 0.75]                 |
| $k_{17}$                          | $0.05 \mu\text{M s}^{-1}$ | constant value               |
| $\beta_1$                         | $0.05 \mu\text{M}$        | constant value               |
| $\beta_2$                         | $1 \mu\text{M}$           | constant value               |
| $\beta_3$                         | 0.55                      | constant value               |
| $d_w, h_w, T_{wy}, k_y, d_y, D_y$ | 1.75, 2, -30, 0.2, 2, 0.1 | Jönsson et al. (2005)        |

698
